# Supplementary material for: Precise isotope analysis of sub-nanogram lead by total evaporation thermal ionization mass spectrometry (TE-TIMS) coupled with a204Pb–207Pb double spike method
Source: Royal Society of Chemistry journal article supplement (doi:10.1039/c6ja00455e), 2017-01-01
Supplement: c6ja00455e1.pdf [file c6ja00455e1.pdf]

## 1 **Supplementary Figure captions**

2 Figure S1. Three isotope plot of individual blocks in a single measurement run for 5ng of  
3 NIST981 Pb standard material with the heating rate of 8 mA/min. Red circle represents the  
4 average of cycles in a block. The MDF line (black line) and the  $^{204}\text{Pb}$  error line (blue dotted  
5 line) are drawn to pass through the value of the integrated intensity ratio. The number of  
6 the plot (#1 to 20) is block number.

# Supplementary Figure

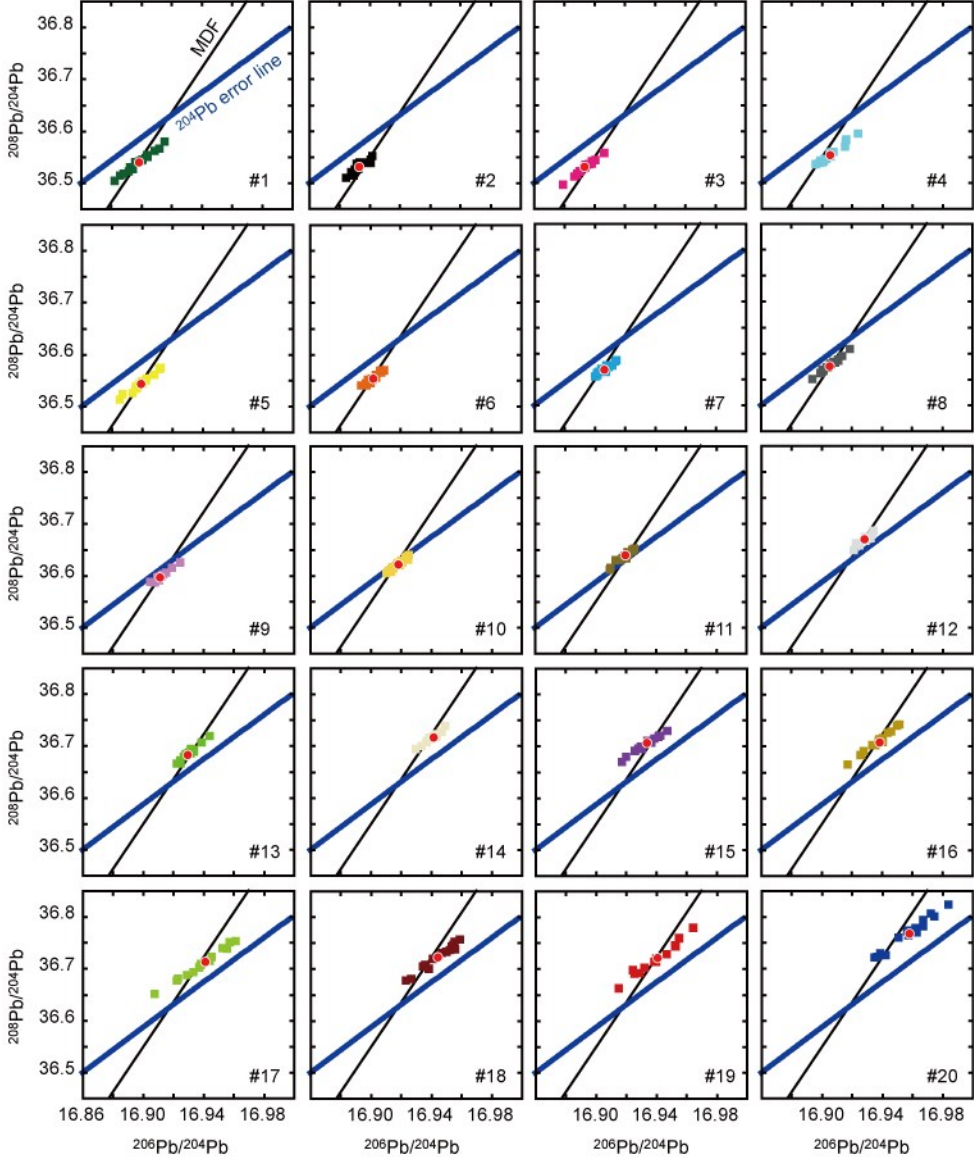

Figure S1
